# Supplementary material
Source: PubMed Central journal article supplement (PMC5884424)
Supplement: NIHMS74384-supplement-Supplementary_table_16.pdf [file NIHMS74384-supplement-Supplementary_table_16.pdf]

Table 16 List of antibodies used for FACS sorting and analysis

| Human Antibodies | Clone       | Fluorochrome     | Company                    | Dilution | Assay                     |
|------------------|-------------|------------------|----------------------------|----------|---------------------------|
| CD2              | RPA-2.10    | Purified/ PE Cy5 | eBioscience, BD            | 1:50     | HSPC sorting              |
| CD3              | HIT3a       | Purified/ PE Cy5 | eBioscience, BD            | 1:50     | HSPC sorting              |
| CD4              | RPA-T4      | Purified/ PE Cy5 | eBioscience, BD            | 1:50     | HSPC sorting              |
| CD7              | eBio124-1D1 | Purified         | eBioscience                | 1:50     | HSPC sorting              |
| CD7              | M-T701      | PE Cy5           | BD                         | 1:50     | HSPC sorting              |
| CD8a             | RPA-T8      | Purified/ PE Cy5 | eBioscience, Biolegend, BD | 1:50     | HSPC sorting              |
| CD11b            | ICRF44      | Purified/ PE Cy5 | eBioscience, BD            | 1:50     | HSPC sorting              |
| CD14             | 61D3        | Purified         | eBioscience                | 1:50     | HSPC sorting              |
| CD14             | MφP9        | PE Cy5           | BD                         | 1:50     | HSPC sorting              |
| CD16             | 3G8         | PE Cy5           | BD                         | 1:50     | HSPC sorting              |
| CD19             | HIB19       | Purified/ PE Cy5 | eBioscience, BD            | 1:50     | HSPC sorting              |
| CD20             | 2H7         | Purified/ PE Cy5 | eBioscience, BD            | 1:50     | HSPC sorting              |
| CD56             | MEM188      | Purified         | eBioscience                | 1:50     | HSPC sorting              |
| CD56             | B159        | PE Cy5           | BD                         | 1:50     | HSPC sorting              |
| CD235a           | HIR2        | Purified         | eBioscience                | 1:50     | HSPC sorting              |
| CD235a           | GA-R2       | PE Cy5           | BD                         | 1:100    | HSPC sorting              |
| CD10             | HI10a       | APC              | BD Biosciences             | 1:40     | HSPC sorting              |
| CD10             | HI10a       | APC Cy7          | Biolegend                  | 1:10     | HSPC sorting              |
| CD34             | 581         | PerCP            | Biolegend                  | 1:20     | HSPC sorting              |
| CD34             | 8G12        | APC              | BD                         | 1:25     | HSPC sorting              |
| CD38             | HIT2        | FITC             | eBioscience                | 1:20     | HSPC sorting              |
| CD38             | HB7         | PE Cy7           | BD                         | 1:50     | HSPC sorting              |
| CD90             | eBio5E10    | Biotin           | eBioscience                | 1:50     | HSPC sorting              |
| CD90             | 5E10        | FITC             | BD                         | 1:25     | HSPC sorting              |
| CD45RA           | HI100       | PE               | eBioscience                | 1:40     | HSPC sorting              |
| CD45RA           | HI100       | BV650            | Biolegend                  | 1:40     | HSPC sorting              |
| CD45RA           | HI100       | BV605            | Biolegend                  | 1:20     | HSPC sorting              |
| CD123            | 6H6         | PE Cy7           | eBioscience                | 1:10     | HSPC sorting              |
| CD123            | 7G3         | PE               | BD                         | 1:10     | HSPC sorting              |
| CD15             | HI98        | FITC             | eBioscience                | 1:20     | B/NK/M/G assay, CFU assay |
| CD14             | 61D3        | PE               | eBioscience                | 1:100    | B/NK/M/G assay, CFU assay |
| CD56             | MEM-188     | APC, PE Cy5      | Biolegend                  | 1:20     | B/NK/M/G assay            |
| CD19             | HIB19       | PE Cy7           | eBioscience                | 1:40     | B/NK/M/G assay            |

|         |        |                |             |       |                                                     |
|---------|--------|----------------|-------------|-------|-----------------------------------------------------|
| CD45    | HI30   | APC eFluor 780 | eBioscience | 1:40  | B/NK/M/G assay,<br>T cell assay, AML<br>engraftment |
| CD34    | 581    | BV605          | Biolegend   | 1:20  | B/NK/M/G assay                                      |
| CD4     | RPA-T4 | APC            | Biolegend   | 1:20  | T cell assay                                        |
| CD8     | RPA-T8 | PE Cy7         | eBioscience | 1:40  | T cell assay                                        |
| CD7     | 4H9    | FITC           | eBioscience | 1:20  | T cell assay                                        |
| CD1a    | HI149  | PE             | eBioscience | 1:40  | T cell assay                                        |
| CD235   | HIR2   | PE Cy5         | Biolegend   | 1:100 | CFU assay                                           |
| CD45    | HI30   | V450           | BD          | 1:25  | Ossicle<br>engraftment                              |
| HLA-ABC | W6/32  | FITC           | eBioscience | 1:50  | Ossicle<br>engraftment                              |
| HLA-ABC | W6/23  | Pacific Blue   | Biolegend   | 1:40  | Ossicle<br>engraftment                              |
| CD33    | WM53   | PE             | BD          | 1:25  | Ossicle<br>engraftment                              |
| CD19    | HIB19  | APC            | BD          | 1:25  | Ossicle<br>engraftment                              |
| CD14    | MφP9   | PE/APC-Cy7     | BD          | 1:25  | Ossicle<br>engraftment                              |
| CD15    | MMA    | FITC           | BD          | 1:50  | Ossicle<br>engraftment                              |

| Others                                               | Clone      | Fluorochrome   | Company       | Dilution | Assay                                       |
|------------------------------------------------------|------------|----------------|---------------|----------|---------------------------------------------|
| Streptavidin                                         | NA         | APC eFluor 780 | eBioscience   | 1:50     | HSPC sorting                                |
| F(ab') <sub>2</sub> -Goat<br>anti-Mouse IgG<br>(H+L) | Polyclonal | Qdot 605       | Invitrogen    | 1:50     | HSPC sorting                                |
| Hoechst 33258<br>(10 mg/ml)                          | NA         | NA             | Invitrogen    | 1:10000  | All assays except<br>Ossicle<br>engraftment |
| Propidium-<br>Iodide<br>(1 mg/ml)                    | NA         | NA             | Thermo Fisher | 1:1000   | Ossicle<br>engraftment                      |
